# Supplementary material for: Short communication: Synchrotron-based elemental mapping of single grains to investigate variable infrared-radiofluorescence emissions for luminescence dating
Source: Copernicus journal article supplement (doi:10.5194/gchron-2023-14), 2023-06-07
Supplement: Supplementary file 1 [file gchron-2023-14-supplement.pdf]

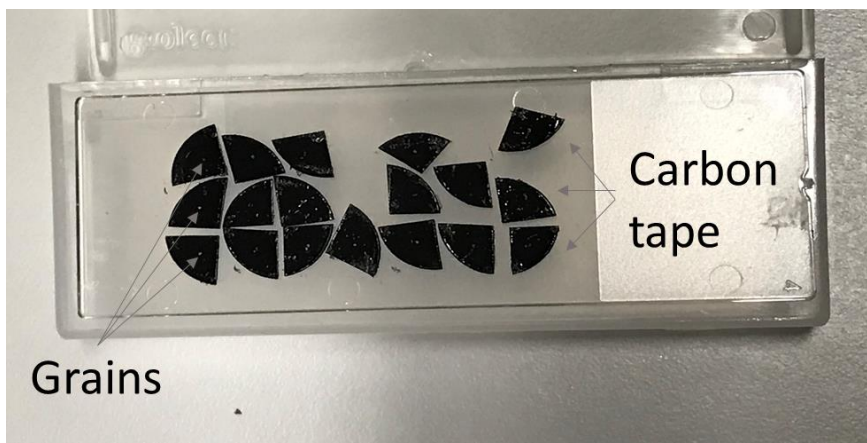

**Figure S1:** Grains mounted for  $\mu$ XRF/ $\mu$ XANES measurements. Grains are attached with carbon tape to avoid movement.

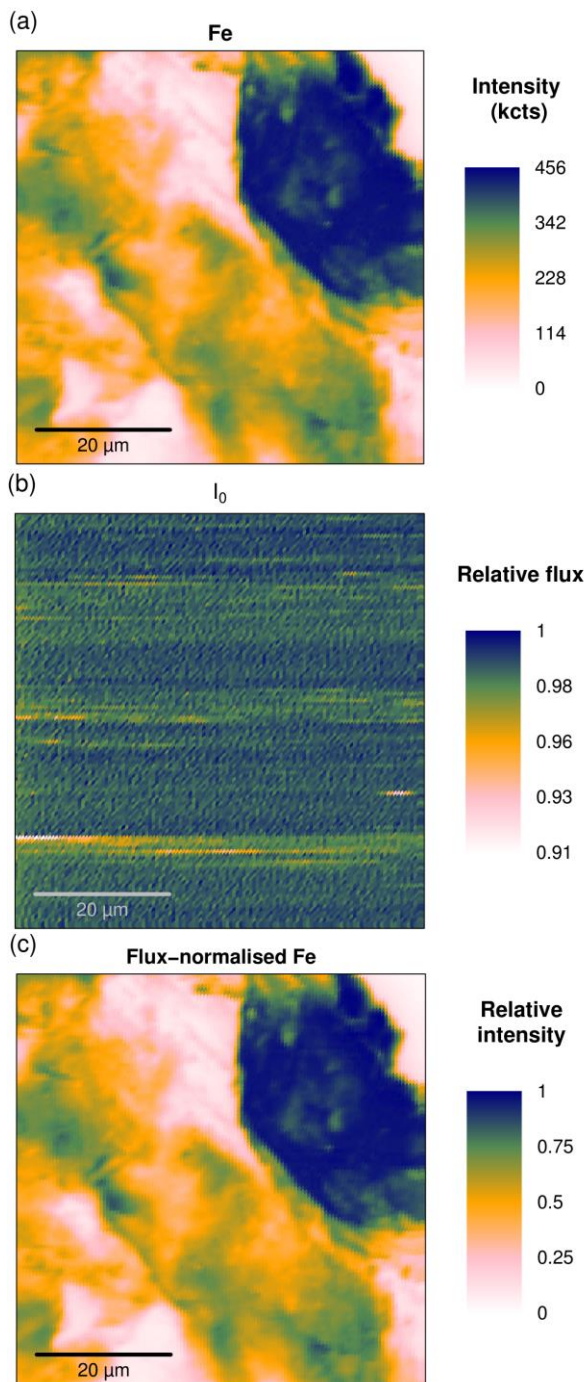

**Figure S2:** Workflow of the X-ray flux ( $I_0$ ) normalisation, taking the Fe map of grain #17 (sample X7368) as an example. The (a) raw counts obtained by fitting the XRF spectra are divided by (b)  $I_0$  to yield (c) a normalised map corrected for flux fluctuations.

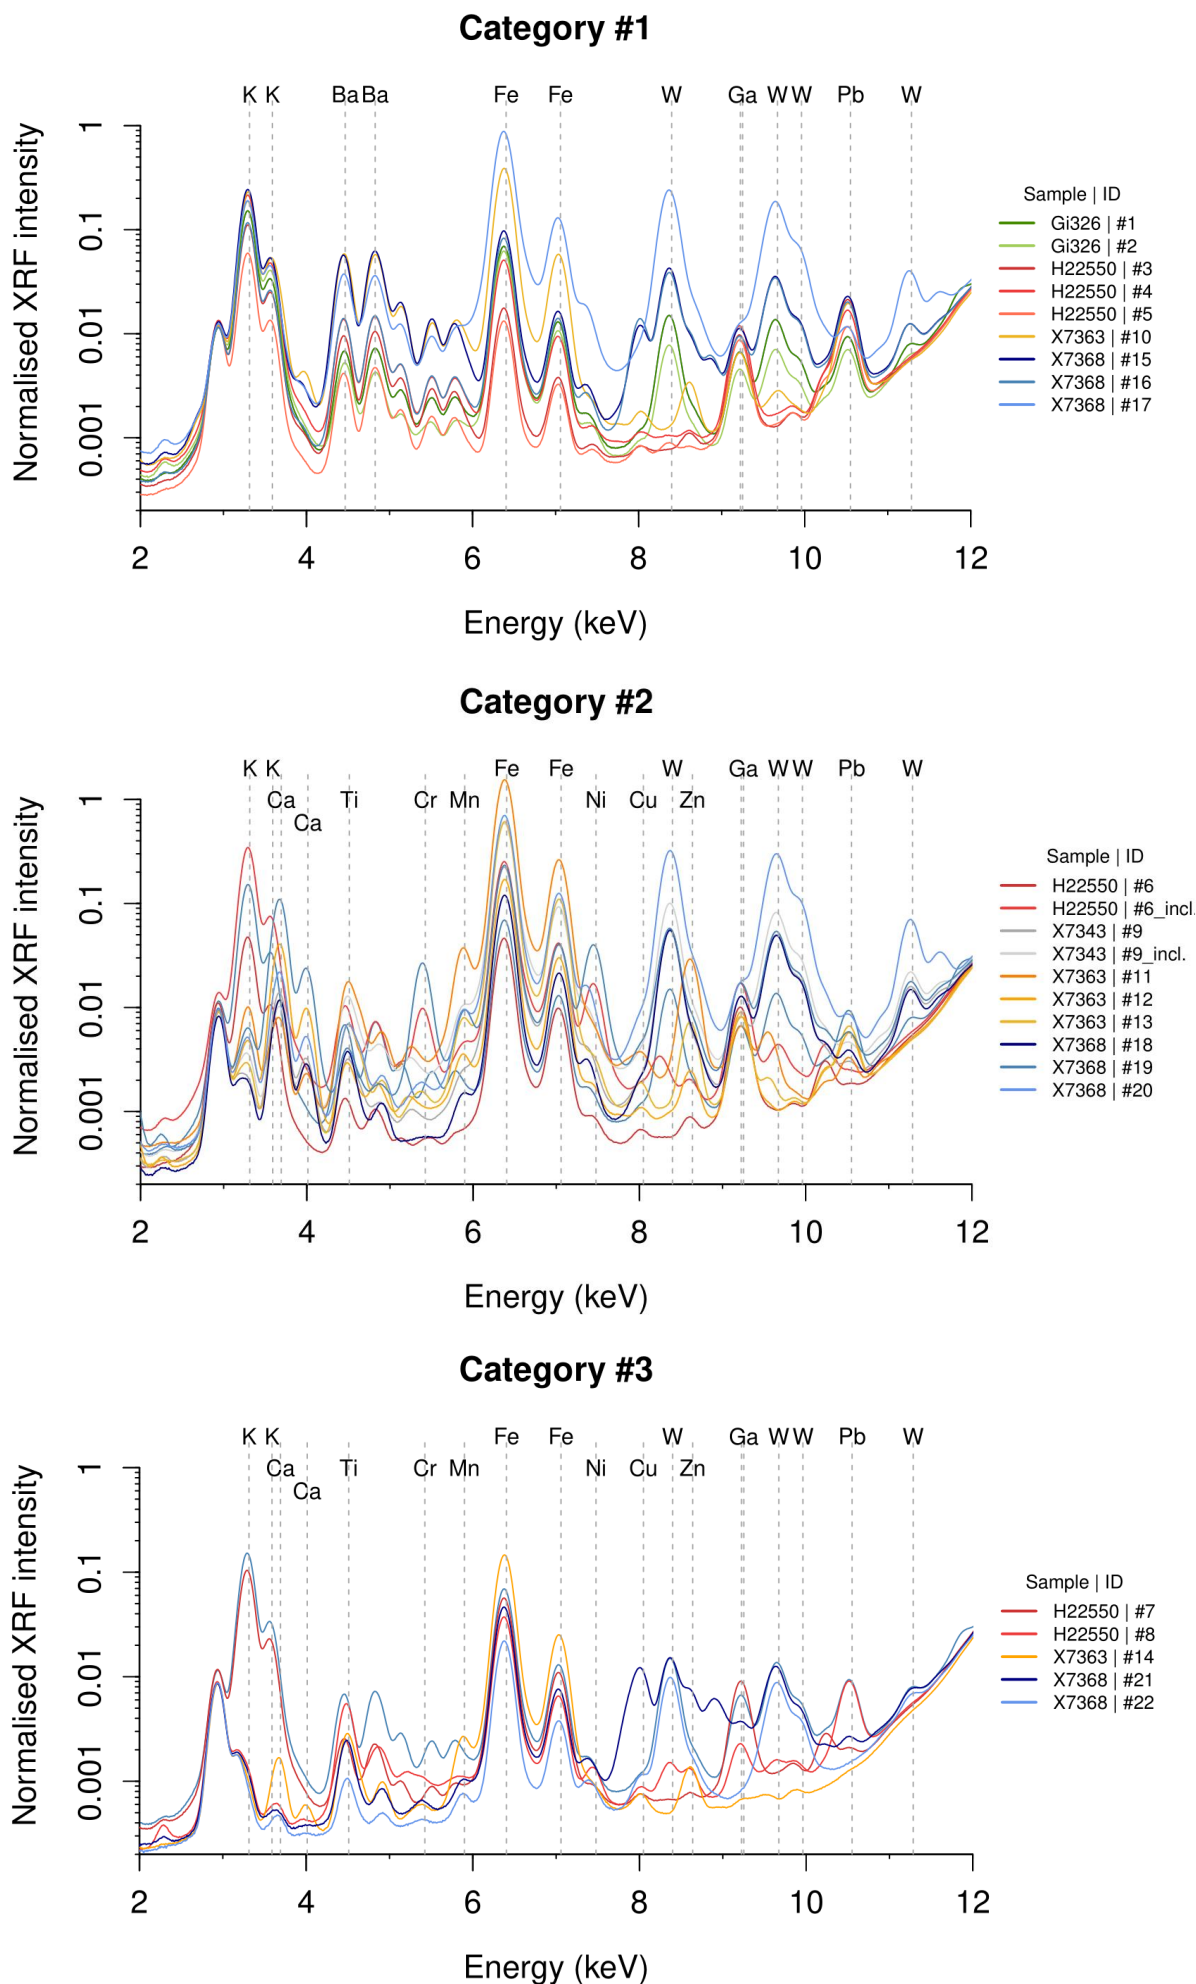

**Figure S3:**  $\mu$ XRF spectra of all grains, separated by IR-RF signal categories. The spectra are normalised to the Compton energy peaks. The characteristic energies of the strongest emissions of the main identified elements are shown as dashed lines.
